# Supplementary material for: Hub Genes in Stable QTLs Orchestrate the Accumulation of Cottonseed Oil in Upland Cotton via Catalyzing Key Steps of Lipid-Related Pathways
Source: MDPI journal article supplement (doi:10.3390/ijms242316595), 2023-11-22
Supplement: s1 [file s1]

**Table S3** Statistical analysis of the three groups of high, medium and low KOC in each environment

| Env.  | grouping   | N   | Mean value | Standard deviation | Varian ce | Min. value | Max. value | Skewness | Kurtosis | CV   |
|-------|------------|-----|------------|--------------------|-----------|------------|------------|----------|----------|------|
| 14AY  | High KOC   | 19  | 32.62      | 1.94               | 3.76      | 29.57      | 35.55      | 0.07     | -1.20    | 5.94 |
|       | Low KOC    | 123 | 27.74      | 0.95               | 0.90      | 25.77      | 29.82      | -0.03    | -0.85    | 3.42 |
|       | Medium KOC | 89  | 28.93      | 0.97               | 0.95      | 26.64      | 30.92      | -0.20    | -0.51    | 3.36 |
| 14KEL | High KOC   | 19  | 33.81      | 2.21               | 4.88      | 29.55      | 37.13      | -0.42    | -0.64    | 6.53 |
|       | Low KOC    | 117 | 28.08      | 0.90               | 0.81      | 25.55      | 29.72      | -0.41    | -0.28    | 3.20 |
|       | Medium KOC | 86  | 29.71      | 0.87               | 0.75      | 28.18      | 31.87      | 0.53     | -0.15    | 2.91 |
| 15ALE | High KOC   | 18  | 31.66      | 1.70               | 2.90      | 28.68      | 35.70      | 0.36     | 0.46     | 5.38 |
|       | Low KOC    | 122 | 26.45      | 0.97               | 0.94      | 24.22      | 29.70      | 0.46     | 0.35     | 3.67 |
|       | Medium KOC | 89  | 27.63      | 1.01               | 1.02      | 25.36      | 29.58      | -0.12    | -0.75    | 3.65 |
| 15AY  | High KOC   | 18  | 32.18      | 2.37               | 5.62      | 27.55      | 36.00      | -0.31    | -0.65    | 7.36 |
|       | Low KOC    | 122 | 25.80      | 0.99               | 0.97      | 23.47      | 28.26      | 0.10     | -0.32    | 3.82 |
|       | Medium KOC | 89  | 27.24      | 1.02               | 1.03      | 24.96      | 30.88      | 0.60     | 1.00     | 3.73 |
| 16AY  | High KOC   | 17  | 33.03      | 2.25               | 5.06      | 29.15      | 35.27      | -0.60    | -1.26    | 6.81 |
|       | Low KOC    | 123 | 26.48      | 0.88               | 0.78      | 24.11      | 28.60      | -0.24    | 0.23     | 3.34 |
|       | Medium KOC | 89  | 28.39      | 0.80               | 0.64      | 26.02      | 30.95      | 0.09     | 0.92     | 2.82 |
| BLUE  | High KOC   | 19  | 32.73      | 1.76               | 3.11      | 29.99      | 35.36      | -0.33    | -1.15    | 5.39 |
|       | Low KOC    | 123 | 26.95      | 0.52               | 0.27      | 25.46      | 27.80      | -0.54    | -0.29    | 1.93 |
|       | Medium KOC | 89  | 28.45      | 0.53               | 0.28      | 27.36      | 29.80      | 0.41     | -0.24    | 1.85 |
