# Supplementary material for: Hub Genes in Stable QTLs Orchestrate the Accumulation of Cottonseed Oil in Upland Cotton via Catalyzing Key Steps of Lipid-Related Pathways
Source: MDPI journal article supplement (doi:10.3390/ijms242316595), 2023-11-22
Supplement: s1 [file s1]

**Table S4** KOC performance of the RILs across different environments and their phenotypic clustering result

| Lines | 14AY  | 14KEL | 15ALE | 15AY  | 16AY  | BLUE  | Phenotypic clustering |
|-------|-------|-------|-------|-------|-------|-------|-----------------------|
| L017  | 29.57 | 30.19 | 29.63 | 31.46 | 30.3  | 30.19 | High KOC              |
| L018  | 31.38 | 32.72 | 31.87 | 27.55 | NA    | 31.16 | High KOC              |
| L031  | 33.91 | 35.25 | 31.31 | 31.81 | NA    | 33.23 | High KOC              |
| L067  | 32.46 | 34.31 | 31.11 | 33.26 | 35.02 | 33.39 | High KOC              |
| L069  | 35.24 | 33.76 | 33.01 | 34.05 | 34.63 | 34.14 | High KOC              |
| L070  | 34.04 | 34.96 | 32.03 | 31.34 | 35.24 | 33.76 | High KOC              |
| L071  | 35.47 | 33.49 | 31.92 | 32.4  | 35.08 | 33.77 | High KOC              |
| L075  | 30.05 | 34.42 | 29.77 | NA    | 29.96 | 31.14 | High KOC              |
| L092  | 31.26 | 31.22 | 30.52 | 29.37 | 29.42 | 30.36 | High KOC              |
| L093  | 35.55 | 36.65 | 35.70 | 35.17 | 33.92 | 35.36 | High KOC              |
| L104  | 33.23 | 36.76 | 33.08 | 34.74 | 35.06 | 34.70 | High KOC              |
| L137  | 30.50 | 29.55 | 28.68 | 29.4  | 31.48 | 30.01 | High KOC              |
| L150  | 30.03 | 31.71 | 29.96 | 28.73 | 29.15 | 29.99 | High KOC              |
| L199  | 32.20 | 31.15 | NA    | 31.56 | 35.27 | 32.74 | High KOC              |
| L202  | 32.39 | 35.61 | 32.48 | 34.61 | 34.48 | 34.00 | High KOC              |
| L207  | 34.94 | 34.09 | 32.89 | 33.14 | 33.27 | 33.66 | High KOC              |
| L208  | 32.15 | 35.08 | 32.51 | 31.08 | 31.99 | 32.7  | High KOC              |
| L214  | 31.36 | 34.36 | 30.14 | 33.57 | 32.11 | 32.33 | High KOC              |
| L229  | 34.04 | 37.13 | 33.22 | 36.00 | 35.04 | 35.14 | High KOC              |
| L005  | 29.37 | 29.02 | 28.48 | 27.03 | 27.18 | 28.22 | Medium KOC            |
| L007  | 27.58 | 30.29 | 28.78 | 27.23 | 27.98 | 28.49 | Medium KOC            |
| L014  | 30.01 | 28.62 | 28.82 | 26.53 | 26.02 | 27.94 | Medium KOC            |
| L024  | 27.83 | 28.80 | 27.45 | 27.03 | 28.65 | 28.07 | Medium KOC            |
| L028  | 29.59 | 29.30 | 27.81 | 27.86 | 26.73 | 28.20 | Medium KOC            |
| L033  | 28.72 | 30.74 | 28.5  | 27.49 | 29.13 | 29.06 | Medium KOC            |
| L035  | 29.67 | 28.68 | 27.4  | 27.09 | 28.29 | 28.27 | Medium KOC            |
| L039  | 30.92 | 28.88 | 28.65 | 28.83 | 28.10 | 28.99 | Medium KOC            |
| L041  | 29.82 | 30.53 | 27.96 | 26.39 | 28.03 | 28.66 | Medium KOC            |
| L042  | 28.95 | 30.14 | 29.27 | 29.16 | 29.21 | 29.38 | Medium KOC            |
| L044  | 29.61 | 29.1  | 28.40 | 27.15 | 27.57 | 28.38 | Medium KOC            |
| L045  | 28.06 | 29.83 | 27.08 | 26.34 | 27.74 | 27.94 | Medium KOC            |
| L049  | 29.52 | 28.26 | 26.71 | 25.93 | 28.16 | 27.81 | Medium KOC            |
| L054  | 30.26 | 30.40 | 27.76 | 25.99 | 27.48 | 28.47 | Medium KOC            |
| L055  | 28.94 | 28.79 | 28.61 | 26.87 | 27.49 | 28.17 | Medium KOC            |
| L057  | 27.88 | 29.92 | 27.85 | 26.04 | 28.87 | 28.32 | Medium KOC            |
| L065  | 28.51 | 30.06 | 27.34 | 26.93 | 29.24 | 28.59 | Medium KOC            |
| L079  | 29.07 | 29.90 | 27.83 | 27.06 | 27.81 | 28.40 | Medium KOC            |
| L082  | 28.47 | 30.07 | 27.27 | 27.23 | 27.94 | 28.29 | Medium KOC            |
| L083  | 29.74 | 31.42 | 28.49 | 30.88 | 28.73 | 29.80 | Medium KOC            |
| L085  | 29.24 | 31.71 | 28.83 | 27.26 | 28.20 | 29.17 | Medium KOC            |

|      |       |       |       |       |       |       |            |
|------|-------|-------|-------|-------|-------|-------|------------|
| L089 | 30.35 | 30.02 | 26.62 | 27.27 | 28.02 | 28.50 | Medium KOC |
| L090 | 29.61 | 29.80 | 26.6  | 27.72 | 28.04 | 28.39 | Medium KOC |
| L091 | 29.28 | 30.36 | 29.34 | 29.14 | 28.22 | 29.25 | Medium KOC |
| L094 | 29.38 | 29.47 | 28.14 | 26.98 | 27.83 | 28.41 | Medium KOC |
| L095 | 28.58 | 30.38 | 28.77 | 27.02 | 27.49 | 28.52 | Medium KOC |
| L096 | 29.33 | 28.18 | 27.11 | 28.63 | 29.74 | 28.64 | Medium KOC |
| L097 | 29.54 | 29.83 | 28.14 | 27.46 | 28.51 | 28.77 | Medium KOC |
| L098 | 29.75 | 29.73 | 27.63 | 27.05 | 28.99 | 28.74 | Medium KOC |
| L100 | 27.51 | 28.95 | 28.16 | 26.91 | 27.8  | 27.95 | Medium KOC |
| L101 | 27.43 | 29.09 | 27.3  | 28.03 | 27.42 | 27.87 | Medium KOC |
| L102 | 28.25 | 29.52 | 27.14 | 27.47 | 27.42 | 28.00 | Medium KOC |
| L103 | 26.88 | 29.46 | 27.98 | 27.08 | 27.69 | 27.92 | Medium KOC |
| L105 | 28.19 | 29.73 | 27.9  | 26.68 | 27.79 | 28.17 | Medium KOC |
| L108 | 29.19 | 29.64 | 28.61 | 28.9  | 27.72 | 28.77 | Medium KOC |
| L109 | 30.7  | 30.18 | 28.13 | 28.72 | 28.84 | 29.32 | Medium KOC |
| L112 | 30.47 | 28.46 | 28.85 | 26.52 | 28.57 | 28.63 | Medium KOC |
| L113 | 29.91 | 28.65 | 26.75 | 26.35 | 29.36 | 28.34 | Medium KOC |
| L114 | 29.43 | 30.80 | 29.49 | 27.71 | 27.94 | 29.13 | Medium KOC |
| L115 | 27.67 | 28.95 | 27.86 | 28.14 | 30.95 | 28.90 | Medium KOC |
| L117 | 29.82 | 29.68 | 26.7  | 26.57 | 28    | 28.24 | Medium KOC |
| L119 | 28.8  | 30.70 | 28.53 | 27.10 | 28.48 | 28.85 | Medium KOC |
| L120 | 29.12 | 29.07 | 28.17 | 26.64 | 29.21 | 28.58 | Medium KOC |
| L121 | 29.61 | 29.70 | 28.27 | 28.23 | 29.06 | 29.03 | Medium KOC |
| L122 | 29.09 | 29.05 | 27.63 | 26.49 | 29.07 | 28.4  | Medium KOC |
| L124 | 28.59 | 28.94 | 28.91 | 26.55 | 26.96 | 28.02 | Medium KOC |
| L125 | 29.57 | 30.66 | 28.79 | 28.86 | 29.44 | 29.53 | Medium KOC |
| L129 | 28.1  | 29.81 | 27.94 | 26.16 | 26.79 | 27.84 | Medium KOC |
| L130 | 30.64 | 29.82 | 29.55 | 27.29 | 29.59 | 29.47 | Medium KOC |
| L131 | 28.26 | 28.80 | 25.36 | 26.96 | 28.24 | 27.62 | Medium KOC |
| L134 | 30.4  | 31.30 | 26.21 | 28.39 | 27.77 | 28.83 | Medium KOC |
| L135 | 28.89 | 28.90 | 28.26 | 27.08 | 28.91 | 28.51 | Medium KOC |
| L139 | 29.73 | 28.92 | 25.75 | 27.36 | 29.01 | 28.24 | Medium KOC |
| L140 | 26.84 | 30.25 | 26.19 | 28.2  | 29.61 | 28.40 | Medium KOC |
| L143 | 29.05 | 28.74 | 26.07 | 27.18 | 28.56 | 28.00 | Medium KOC |
| L144 | 29.38 | 30.21 | 26.49 | 28.31 | 28.35 | 28.59 | Medium KOC |
| L145 | 27.4  | 29.95 | 27.39 | 27.93 | 26.96 | 27.95 | Medium KOC |
| L146 | 28.31 | 31.87 | 27.71 | 28.53 | 28.30 | 29.04 | Medium KOC |
| L147 | 27.8  | 28.62 | 26.43 | 27.66 | 28.06 | 27.77 | Medium KOC |
| L148 | 28.47 | 31.69 | 27.79 | 28.4  | 28.4  | 29.05 | Medium KOC |
| L152 | 29.19 | 29.46 | 26.33 | 28.41 | 28.76 | 28.47 | Medium KOC |
| L156 | 29.24 | 30.97 | 26.60 | 26.58 | 29.81 | 28.87 | Medium KOC |
| L157 | 28.93 | 29.81 | 26.28 | 26.19 | 27.78 | 27.92 | Medium KOC |
| L158 | 30.24 | 31.87 | 27.90 | 28.80 | 29.27 | 29.70 | Medium KOC |
| L159 | 27.91 | 29.03 | 26.33 | 26.95 | 28.67 | 27.91 | Medium KOC |

|      |       |       |       |       |       |       |            |
|------|-------|-------|-------|-------|-------|-------|------------|
| L162 | 30.48 | 30.16 | 26.13 | 27.79 | 29.31 | 28.87 | Medium KOC |
| L164 | 28.85 | 29.91 | 27.80 | 25.90 | 29.06 | 28.50 | Medium KOC |
| L167 | 29.84 | 30.14 | 26.73 | 26.68 | 28.83 | 28.58 | Medium KOC |
| L168 | 27.23 | 28.69 | 26.12 | 26.66 | 28.9  | 27.69 | Medium KOC |
| L172 | 30.33 | 28.98 | 28.65 | 27.63 | 28.24 | 28.77 | Medium KOC |
| L173 | 28.49 | 28.99 | 27.37 | 28.17 | 28.23 | 28.27 | Medium KOC |
| L177 | 28.63 | 28.54 | 27.46 | 25.91 | 27.70 | 27.74 | Medium KOC |
| L178 | 28.01 | 28.99 | 27.29 | 25.67 | 28.72 | 27.92 | Medium KOC |
| L179 | 30.2  | 30.02 | 29.25 | 27.65 | 28.28 | 29.11 | Medium KOC |
| L180 | 28.19 | NA    | 27.08 | 25.09 | 28.35 | 27.36 | Medium KOC |
| L182 | 28.79 | 29.72 | 26.18 | 26.98 | 29.23 | 28.34 | Medium KOC |
| L187 | 30.13 | 28.81 | 26.73 | 27.17 | 27.87 | 28.16 | Medium KOC |
| L190 | 28.38 | 29.09 | 27.18 | 24.96 | 28.35 | 27.79 | Medium KOC |
| L191 | 29.55 | 29.23 | 26.53 | 26.19 | 28.71 | 28.18 | Medium KOC |
| L193 | 28.14 | 28.54 | 28.38 | 27.03 | 28.5  | 28.2  | Medium KOC |
| L194 | 27.85 | NA    | 25.57 | 25.69 | 29.38 | 27.36 | Medium KOC |
| L195 | 28.13 | 29.94 | 26.17 | 25.94 | 28.31 | 27.88 | Medium KOC |
| L198 | 28.24 | 29.92 | 26.93 | 27.42 | 28.37 | 28.28 | Medium KOC |
| L211 | 27.11 | 30.50 | 27.46 | 26.97 | 28.17 | 28.20 | Medium KOC |
| L212 | 28.64 | 30.79 | 28.21 | 26.22 | 28.02 | 28.54 | Medium KOC |
| L217 | 28.85 | 30.51 | 27.59 | 29.42 | 30.23 | 29.42 | Medium KOC |
| L220 | 29.02 | 30.64 | 29.58 | 27.36 | 29.00 | 29.25 | Medium KOC |
| L222 | 28.72 | NA    | 28.91 | 26.89 | 28.6  | 28.37 | Medium KOC |
| L228 | 26.64 | 29.52 | 27.91 | 26.30 | 28.39 | 27.94 | Medium KOC |
| L001 | 28.22 | 28.01 | 27.77 | 25.97 | 27.09 | 27.47 | Low KOC    |
| L002 | 26.78 | 28.53 | 28.00 | 25.95 | 27.63 | 27.51 | Low KOC    |
| L003 | 27    | 27.89 | 25.97 | 24.75 | 25.93 | 26.40 | Low KOC    |
| L004 | 26.49 | 28.06 | 27.23 | 24.19 | 24.22 | 26.08 | Low KOC    |
| L006 | 27.48 | 28.82 | 27.04 | 26.51 | 25.16 | 26.97 | Low KOC    |
| L008 | 27.49 | 25.55 | 25.57 | 24.46 | 25.43 | 25.7  | Low KOC    |
| L009 | 29.29 | 28.77 | 26.12 | 25.73 | 25.99 | 27.2  | Low KOC    |
| L010 | 26.07 | 26.99 | 25.65 | 25.8  | 26.12 | 26.17 | Low KOC    |
| L011 | 27.78 | 27.76 | 27.90 | 25.64 | 26.69 | 27.21 | Low KOC    |
| L012 | 26.61 | 27.03 | 25.34 | 24.13 | 24.11 | 25.46 | Low KOC    |
| L013 | 29    | NA    | 27.80 | 25.61 | 25.39 | 26.86 | Low KOC    |
| L015 | 28.18 | 27.44 | 26.67 | 25.38 | 25.41 | 26.6  | Low KOC    |
| L016 | 27.1  | 26.34 | 25.86 | 24.44 | 25.21 | 25.81 | Low KOC    |
| L019 | 28.78 | 28.35 | 28.09 | 24.63 | 26.77 | 27.42 | Low KOC    |
| L020 | 28.88 | 27.87 | 28.37 | 23.47 | 25.71 | 26.94 | Low KOC    |
| L021 | 28.93 | 26.82 | 26.82 | 27.02 | 26.92 | 27.24 | Low KOC    |
| L022 | 29.1  | 29.52 | 27.24 | 25.52 | 26.26 | 27.59 | Low KOC    |
| L023 | 26.43 | 28.54 | 27.00 | 25.35 | 25.54 | 26.64 | Low KOC    |
| L025 | 28.77 | 27.24 | 27.00 | 27.59 | 28.29 | 27.78 | Low KOC    |
| L026 | 28.03 | 26.25 | 29.70 | 26.44 | 27.53 | 27.58 | Low KOC    |

|      |       |       |       |       |       |       |         |
|------|-------|-------|-------|-------|-------|-------|---------|
| L027 | 26.03 | 28.85 | 27.15 | 25.11 | 28.60 | 27.41 | Low KOC |
| L029 | 26.88 | 28.05 | 26.21 | 24.05 | 25.24 | 26.18 | Low KOC |
| L030 | 26.34 | 28.22 | 26.92 | 25.57 | 26.59 | 26.83 | Low KOC |
| L032 | 28.44 | 27.24 | 27.85 | 26.68 | 26.07 | 27.19 | Low KOC |
| L034 | 26.34 | 26.86 | 26.98 | 24.51 | 24.31 | 25.80 | Low KOC |
| L036 | 27.88 | 26.98 | 26.91 | 25.43 | 26.81 | 26.85 | Low KOC |
| L037 | 26.69 | 26    | 25.41 | 24.42 | 25.67 | 25.69 | Low KOC |
| L038 | 28.52 | 28.31 | 27.05 | 25.91 | 26.63 | 27.32 | Low KOC |
| L040 | 28.28 | 28.81 | 28.73 | 25.33 | 26.42 | 27.58 | Low KOC |
| L043 | 27.93 | 28.66 | 27    | 25.97 | 26.76 | 27.33 | Low KOC |
| L046 | 28.39 | 28.32 | 28.68 | 26.32 | 26.81 | 27.72 | Low KOC |
| L047 | 29.04 | 28.99 | 26.32 | 25.77 | 27.09 | 27.52 | Low KOC |
| L048 | 27.37 | 27.37 | 26.11 | 26.19 | 26.54 | 26.74 | Low KOC |
| L050 | 28.13 | 27.52 | 26.95 | 24.34 | 25.53 | 26.54 | Low KOC |
| L051 | 29.03 | 28.58 | 25.63 | 25.72 | 25.72 | 26.94 | Low KOC |
| L052 | 28.13 | 28.36 | 26.24 | 26.19 | 27.22 | 27.3  | Low KOC |
| L053 | 28.67 | 27.82 | 27.96 | 25.76 | 25.77 | 27.17 | Low KOC |
| L056 | 28.55 | 27.88 | 28.01 | 26.18 | 26.87 | 27.52 | Low KOC |
| L058 | 27.79 | 29.1  | 25.28 | 26.96 | 26.34 | 27.11 | Low KOC |
| L059 | 27.8  | 28.22 | 26.27 | 25.56 | 24.17 | 26.35 | Low KOC |
| L060 | 27.87 | 27.69 | 26.04 | 24.85 | 26.42 | 26.66 | Low KOC |
| L061 | 26.83 | 27.45 | 25.71 | 25.59 | 26.15 | 26.4  | Low KOC |
| L062 | 27.17 | 28.75 | 25.13 | 25.42 | 25.17 | 26.37 | Low KOC |
| L063 | 29.35 | NA    | 27.31 | 25.27 | 26    | 26.95 | Low KOC |
| L064 | 28.93 | 28.71 | 26.01 | 27.24 | 26.5  | 27.45 | Low KOC |
| L066 | 26.39 | 27.55 | 26.56 | 25.69 | 28.33 | 27.07 | Low KOC |
| L068 | 29.47 | NA    | 26.07 | 27.33 | 26.48 | 27.22 | Low KOC |
| L072 | 26.2  | 29.11 | 27.22 | 25.57 | 26.9  | 27.15 | Low KOC |
| L073 | 28.72 | 28.13 | 25.21 | 27.47 | 26.36 | 27.12 | Low KOC |
| L074 | 28.32 | 29.61 | 26.1  | 27.46 | 26.8  | 27.67 | Low KOC |
| L076 | 28.2  | 27.27 | 24.91 | 27.09 | 25.56 | 26.52 | Low KOC |
| L077 | 28.17 | 29.47 | 27.5  | 25.3  | 26.2  | 27.42 | Low KOC |
| L078 | 28.02 | 29.35 | 25.79 | 24.45 | 26.51 | 26.98 | Low KOC |
| L080 | 28.69 | 27.49 | 26.47 | 24.91 | 28.26 | 27.31 | Low KOC |
| L081 | 29.75 | 28.9  | 26.38 | 25.65 | 26.72 | 27.52 | Low KOC |
| L084 | 27.28 | NA    | 26.58 | 25.7  | 26.26 | 26.46 | Low KOC |
| L086 | 27.28 | 29.31 | 26.83 | 27.56 | 26.37 | 27.47 | Low KOC |
| L087 | 27.74 | 27.91 | 25.39 | 25.08 | 25.28 | 26.3  | Low KOC |
| L088 | 29.33 | 29.52 | 25.75 | 25.64 | 27.27 | 27.61 | Low KOC |
| L099 | 25.98 | 28.67 | 26.26 | 24.31 | 26.46 | 26.52 | Low KOC |
| L106 | 26.21 | 29.11 | 26.33 | 27.87 | 26.86 | 27.31 | Low KOC |
| L107 | 29.02 | 27.46 | 25.98 | 25.98 | 25.2  | 26.65 | Low KOC |
| L110 | 28.29 | 26.78 | 26.45 | 23.95 | 25.19 | 26.15 | Low KOC |
| L111 | 26.35 | 26.22 | 25.48 | 25.33 | 27.02 | 26.17 | Low KOC |

|      |       |       |       |       |       |       |         |
|------|-------|-------|-------|-------|-------|-------|---------|
| L116 | 27.65 | 29.4  | 26.7  | 26.65 | 27.96 | 27.8  | Low KOC |
| L118 | 28.88 | 27.94 | 26.29 | 24.98 | 27.3  | 27.18 | Low KOC |
| L123 | 26.73 | 27.66 | 26.56 | 25.44 | 26.67 | 26.7  | Low KOC |
| L126 | 27.42 | 29.08 | 27.6  | 25.54 | 26.25 | 27.26 | Low KOC |
| L127 | 27.22 | 28.19 | 25.96 | 25.9  | 27.23 | 27    | Low KOC |
| L128 | 27.58 | 28.98 | 26.31 | 26.77 | 26.58 | 27.28 | Low KOC |
| L132 | 28.58 | 28.92 | 26.01 | 26.73 | 27.36 | 27.58 | Low KOC |
| L133 | 27.3  | 27.93 | 26.66 | 25.91 | 26.6  | 26.94 | Low KOC |
| L136 | 26.59 | 27.48 | 26.1  | 26.94 | 27.11 | 26.88 | Low KOC |
| L138 | 28.56 | 27.17 | 27.45 | 27.05 | 26.89 | 27.38 | Low KOC |
| L141 | 28.26 | 27.79 | 25.39 | 25.78 | 25.47 | 26.52 | Low KOC |
| L142 | 28.06 | 29.4  | 25.2  | 26.21 | 26.64 | 27.18 | Low KOC |
| L149 | 27.66 | 29.08 | 26.17 | 26.58 | 28.03 | 27.63 | Low KOC |
| L151 | 27.86 | 29.72 | 26.13 | 26.49 | 27.48 | 27.65 | Low KOC |
| L153 | 28.23 | 29.11 | 26.27 | 27.53 | 27.09 | 27.66 | Low KOC |
| L154 | 27.82 | 27.07 | 26.08 | 25.47 | 26.49 | 26.62 | Low KOC |
| L155 | 27.82 | 27.98 | 25.73 | 25.84 | 26.81 | 26.9  | Low KOC |
| L160 | 26.44 | 28.35 | 27.02 | 26.52 | 25.94 | 26.88 | Low KOC |
| L161 | 27.28 | 27.45 | 25.84 | 27.08 | 28.01 | 27.19 | Low KOC |
| L163 | 27.54 | NA    | 26.51 | 26.75 | 27.23 | 27.03 | Low KOC |
| L165 | 29.82 | 29.2  | 25.34 | 27.57 | 26.79 | 27.71 | Low KOC |
| L166 | 28.76 | 28.14 | 25.93 | 25.83 | 27.03 | 27.2  | Low KOC |
| L169 | 26.45 | 28.88 | 24.52 | 25.21 | 26.68 | 26.51 | Low KOC |
| L170 | 27.39 | 28.14 | 26.31 | 25.38 | 25.87 | 26.67 | Low KOC |
| L171 | 26.2  | 27.99 | 25.97 | 25.4  | 25.56 | 26.29 | Low KOC |
| L174 | 29.14 | 28.58 | 26.08 | 26.83 | 26.11 | 27.31 | Low KOC |
| L175 | 28.04 | 28.16 | 26.08 | 25.8  | 25.26 | 26.65 | Low KOC |
| L176 | 28.07 | 26.86 | 26.34 | 24.94 | 26.15 | 26.51 | Low KOC |
| L181 | 27.59 | 28.69 | 26.42 | 25.42 | 27.27 | 27.21 | Low KOC |
| L183 | 26.73 | 29.39 | 26.61 | 26.57 | 27.91 | 27.59 | Low KOC |
| L184 | 27.18 | 28.14 | 26.16 | 25.61 | 27.37 | 27.02 | Low KOC |
| L185 | 26.62 | 28.71 | 25.01 | 25.56 | 25.17 | 26.26 | Low KOC |
| L186 | 28.42 | 27.75 | 24.66 | 24.67 | 25.3  | 26.19 | Low KOC |
| L188 | 27.57 | 27.32 | 24.95 | 26.39 | 27.63 | 26.84 | Low KOC |
| L189 | 26.8  | 28.53 | 25.7  | 23.88 | 27.18 | 26.64 | Low KOC |
| L192 | 28.66 | 28.43 | 26.25 | 26.67 | 27.22 | 27.48 | Low KOC |
| L196 | 26.91 | 28    | 24.22 | 27.83 | 26.54 | 26.68 | Low KOC |
| L197 | 27.07 | 27.63 | 25.16 | 25.74 | 27.59 | 26.76 | Low KOC |
| L200 | 28.07 | 26.67 | 25.42 | 28.26 | 26.37 | 26.83 | Low KOC |
| L201 | 26.79 | 27.48 | 25.54 | 26    | 26    | 26.39 | Low KOC |
| L203 | 26.56 | 26.97 | 25.05 | 24.84 | 26.07 | 25.98 | Low KOC |
| L204 | 27.5  | 27.09 | 27.04 | 25.24 | 25.99 | 26.6  | Low KOC |
| L205 | 28.72 | 28.59 | 26.66 | 26.3  | 27.3  | 27.57 | Low KOC |
| L206 | 29.22 | 29.04 | 26.61 | 25.94 | 26.34 | 27.46 | Low KOC |

|      |       |       |       |       |       |       |         |
|------|-------|-------|-------|-------|-------|-------|---------|
| L209 | 28.48 | 27.98 | 26.29 | 26.56 | 27.38 | 27.38 | Low KOC |
| L210 | 28.05 | NA    | 27.7  | 25.02 | 26.16 | 26.76 | Low KOC |
| L213 | 27.15 | 27.22 | 26.2  | 26.41 | 27.54 | 26.97 | Low KOC |
| L215 | 27.7  | 28.23 | 25.68 | 25.81 | 26.11 | 26.75 | Low KOC |
| L216 | 26.44 | 28.53 | 24.82 | 23.95 | 26.59 | 26.27 | Low KOC |
| L218 | 28.36 | 29.37 | 27.33 | 26.62 | 26.34 | 27.63 | Low KOC |
| L219 | 26.51 | 27.88 | 26.02 | 25.18 | 26.78 | 26.6  | Low KOC |
| L221 | 27.2  | 26.26 | 27.83 | 24.98 | 26.88 | 26.69 | Low KOC |
| L223 | 28.06 | 28.06 | NA    | NA    | 26.31 | 27.39 | Low KOC |
| L224 | 28.79 | 29.14 | 27.64 | 26.12 | 25.95 | 27.53 | Low KOC |
| L225 | 27.27 | 28.53 | 26.99 | 25.3  | 26.45 | 27.01 | Low KOC |
| L226 | 27.92 | 26.09 | 27.36 | 27.29 | 27.41 | 27.17 | Low KOC |
| L227 | 27.59 | 28.93 | 26.68 | 24.14 | 27.48 | 27.18 | Low KOC |
| L230 | 25.77 | 27.75 | 28.39 | 24.53 | 26.01 | 26.61 | Low KOC |
| L231 | 26.96 | 27.83 | 27.88 | 26.39 | 26.9  | 27.24 | Low KOC |

---
