# Supplementary material for: Hub Genes in Stable QTLs Orchestrate the Accumulation of Cottonseed Oil in Upland Cotton via Catalyzing Key Steps of Lipid-Related Pathways
Source: MDPI journal article supplement (doi:10.3390/ijms242316595), 2023-11-22
Supplement: s1 [file s1]

**Table S2** Analysis of variance of KOC trait under multiple environments

| Env.  | Source      | Df  | Sum sq  | Mean sq | F-value    | Pr(>F)        |
|-------|-------------|-----|---------|---------|------------|---------------|
| 14AY  | Replication | 1   | 16.44   | 16.4409 | 11.0110    | 0.001054 **   |
|       | Genotype    | 230 | 1437.39 | 6.2495  | 4.1855     | < 2.2e-16 *** |
|       | Residuals   | 228 | 340.43  | 1.4931  |            |               |
| 15AY  | Replication | 1   | 50.52   | 50.519  | 35.1416    | 1.125e-08 *** |
|       | Genotype    | 230 | 1872.06 | 8.1390  | 5.6619     | < 2.2e-16 *** |
|       | Residuals   | 228 | 327.77  | 1.4380  |            |               |
| 16AY  | Replication | 1   | 3.12    | 3.1157  | 3.5250     | 0.06172       |
|       | Genotype    | 230 | 1915.24 | 8.3271  | 9.4211     | < 2e-16 ***   |
|       | Residuals   | 230 | 203.29  | 0.8839  |            |               |
| 14KEL | Replication | 1   | 20.80   | 20.8006 | 7.9510     | 0.005226 **   |
|       | Genotype    | 230 | 2121.46 | 9.2238  | 3.5257     | < 2.2e-16 *** |
|       | Residuals   | 230 | 601.71  | 2.6161  |            |               |
| 15ALE | Replication | 1   | 24.53   | 24.5342 | 22.1283    | 4.4e-06 ***   |
|       | Genotype    | 230 | 1431.46 | 6.2237  | 5.6134     | < 2e-16 ***   |
|       | Residuals   | 230 | 255.01  | 1.1087  |            |               |
| BLUE  | Replication | 1   | 0.0     | 0.0000  | 2.4160e-01 | 0.6236        |
|       | Genotype    | 230 | 1328.3  | 5.7753  | 6.5953e+27 | < 2e-16 ***   |
|       | Residuals   | 230 | 0.0     | 0.0000  |            |               |

Significant codes: ‘\*\*\*’ 0.001, ‘\*\*’ 0.01, ‘\*’ 0.05.
