# Supplementary material for: Hub Genes in Stable QTLs Orchestrate the Accumulation of Cottonseed Oil in Upland Cotton via Catalyzing Key Steps of Lipid-Related Pathways
Source: MDPI journal article supplement (doi:10.3390/ijms242316595), 2023-11-22
Supplement: s1 [file s1]

**Table S1** Brief depiction of the HDGMs of the RIL population

| Chromosome ID             | SLAF-seq. genetic map |             |                              | CHIP genetic map |             |                              |
|---------------------------|-----------------------|-------------|------------------------------|------------------|-------------|------------------------------|
|                           | No. markers           | Length (cM) | Average marker interval (cM) | No. of markers   | Length (cM) | Average marker interval (cM) |
| Chr01                     | 81                    | 125.45      | 1.55                         | 236              | 112.38      | 0.49                         |
| Chr02                     | 68                    | 170.63      | 2.51                         | 61               | 57.22       | 0.97                         |
| Chr03                     | 205                   | 144.86      | 0.71                         | 310              | 85.26       | 0.28                         |
| Chr04                     | 94                    | 179.64      | 1.91                         | 226              | 98.49       | 0.44                         |
| Chr05                     | 166                   | 153.29      | 0.92                         | 294              | 163.46      | 0.57                         |
| Chr06                     | 99                    | 169.47      | 1.71                         | 187              | 85.28       | 0.46                         |
| Chr07                     | 608                   | 174.41      | 0.29                         | 231              | 145.52      | 0.66                         |
| Chr08                     | 306                   | 128.84      | 0.42                         | 481              | 142.55      | 0.32                         |
| Chr09                     | 253                   | 127.37      | 0.50                         | 225              | 107.03      | 0.49                         |
| Chr10                     | 101                   | 173.24      | 1.72                         | 103              | 78.66       | 0.78                         |
| Chr11                     | 105                   | 173.16      | 1.65                         | 205              | 109.33      | 0.57                         |
| Chr12                     | 394                   | 148.73      | 0.38                         | 397              | 157.24      | 0.41                         |
| Chr13                     | 821                   | 150.18      | 0.18                         | 344              | 132.40      | 0.40                         |
| A <sub>t</sub> sub-genome | 3301                  | 2019.26     | 1.11                         | 3300             | 1474.63     | 0.45                         |
| Chr14                     | 116                   | 163.18      | 1.41                         | 319              | 112.26      | 0.36                         |
| Chr15                     | 25                    | 129.43      | 5.18                         | 124              | 69.36       | 0.64                         |
| Chr16                     | 149                   | 141.82      | 0.95                         | 55               | 53.91       | 0.98                         |
| Chr17                     | 17                    | 172.91      | 10.17                        | 19               | 60.60       | 3.56                         |
| Chr18                     | 68                    | 172.08      | 2.53                         | 58               | 45.05       | 0.79                         |
| Chr19                     | 91                    | 153.36      | 1.69                         | 240              | 103.53      | 0.44                         |
| Chr20                     | 185                   | 165.77      | 0.90                         | 145              | 84.74       | 0.59                         |
| Chr21                     | 82                    | 140.43      | 1.71                         | 150              | 127.93      | 0.87                         |
| Chr22                     | 25                    | 42.97       | 1.72                         | 93               | 83.17       | 0.92                         |
| Chr23                     | 48                    | 130.45      | 2.72                         | 94               | 57.14       | 0.63                         |
| Chr24                     | 30                    | 130.27      | 4.34                         | 113              | 57.89       | 0.52                         |
| Chr25                     | 38                    | 127.49      | 3.36                         | 82               | 87.29       | 1.06                         |
| Chr26                     | 191                   | 137.48      | 0.72                         | 59               | 60.49       | 1.06                         |
| D <sub>t</sub> sub-genome | 1065                  | 1807.65     | 2.87                         | 1551             | 1003.36     | 0.65                         |
| Total                     | 4366                  | 3826.92     | 1.99                         | 4851             | 2477.99     | 0.51                         |
