# Supplementary material for: Hub Genes in Stable QTLs Orchestrate the Accumulation of Cottonseed Oil in Upland Cotton via Catalyzing Key Steps of Lipid-Related Pathways
Source: MDPI journal article supplement (doi:10.3390/ijms242316595), 2023-11-22
Supplement: s1 [file s1]

**Table S5** Basic information of KOC QTLs of cottonseed identified via SLAF-seq strategy

| Strategies | QTLs                      | Env No | Env   | Position<br>(cM) | LOD  | Additive effect* |       | R2    | References |
|------------|---------------------------|--------|-------|------------------|------|------------------|-------|-------|------------|
|            |                           |        |       |                  |      | ♂(+)             | ♀(-)  |       |            |
| slaf       | qOC <sup>slaf</sup> -c1-1 | 1      | 15AY  | 0.61             | 2.23 | 0.78             |       | 3.83  |            |
| slaf       | qOC <sup>slaf</sup> -c1-2 | 2      | 16AY  | 6.01             | 2.25 | 2.63             |       | 47.38 |            |
|            |                           |        | BLUE  | 6.01             | 3.59 | 2.31             |       | 48.35 |            |
| slaf       | qOC <sup>slaf</sup> -c1-3 | 1      | 15ALE | 48.91            | 2.07 |                  | -1.35 | 4.17  |            |
| slaf       | qOC <sup>slaf</sup> -c2-1 | 1      | 15AY  | 154.61           | 2.60 | 1.16             |       | 19.90 |            |
| slaf       | qOC <sup>slaf</sup> -c2-2 | 1      | 14KEL | 164.21           | 2.75 | 0.93             |       | 5.08  |            |
| slaf       | qOC <sup>slaf</sup> -c2-3 | 1      | 14AY  | 169.21           | 2.44 | 0.84             |       | 4.97  |            |
| slaf       | qOC <sup>slaf</sup> -c4-1 | 1      | 14KEL | 37.81            | 2.27 |                  | -0.73 | 4.27  |            |
| slaf       | qOC <sup>slaf</sup> -c4-2 | 3      | 15AY  | 91.51            | 4.12 | 1.43             |       | 25.22 |            |
|            |                           |        | 16AY  | 90.51            | 4.25 | 1.15             |       | 16.78 |            |
|            |                           |        | BLUE  | 90.51            | 3.02 | 0.93             |       | 16.55 |            |
| slaf       | qOC <sup>slaf</sup> -c5-1 | 1      | 15ALE | 83.41            | 1.95 | 0.72             |       | 3.78  |            |
| slaf       | qOC <sup>slaf</sup> -c5-2 | 1      | 14KEL | 87.01            | 2.07 | 0.59             |       | 3.86  |            |
| slaf       | qOC <sup>slaf</sup> -c5-3 | 1      | 14AY  | 83.91            | 3.78 | 0.65             |       | 6.89  |            |
| slaf       | qOC <sup>slaf</sup> -c7-1 | 6      | 14AY  | 28.31            | 2.85 |                  | -0.76 | 5.22  |            |
|            |                           |        | 14KEL | 37.41            | 2.06 |                  | -0.46 | 3.57  |            |
|            |                           |        | 15ALE | 28.31            | 2.36 |                  | -0.68 | 4.26  |            |
|            |                           |        | 15AY  | 28.31            | 4.26 |                  | -1.04 | 7.75  |            |
|            |                           |        | 16AY  | 28.31            | 4.79 |                  | -1.11 | 8.91  |            |

|      |                            |   |       |        |      |      |       |      |
|------|----------------------------|---|-------|--------|------|------|-------|------|
|      |                            |   | BLUE  | 28.31  | 4.36 |      | -0.87 | 7.89 |
| slaf | qOC <sup>slaf</sup> -c7-2  | 2 | 15AY  | 38.61  | 2.63 | 0.82 |       | 5.05 |
|      |                            |   | BLUE  | 38.91  | 3.01 | 0.69 |       | 5.73 |
| slaf | qOC <sup>slaf</sup> -c7-3  | 4 | 14AY  | 48.91  | 4.15 | 0.88 |       | 7.35 |
|      |                            |   | 14KEL | 45.91  | 2.02 | 0.57 |       | 3.20 |
|      |                            |   | 15ALE | 47.41  | 2.50 | 0.59 |       | 4.41 |
|      |                            |   | BLUE  | 48.91  | 2.84 | 0.65 |       | 4.79 |
| slaf | qOC <sup>slaf</sup> -c7-4  | 1 | 14KEL | 78.31  | 2.61 | 0.60 |       | 4.13 |
| slaf | qOC <sup>slaf</sup> -c7-5  | 1 | 14KEL | 112.31 | 2.36 | 0.55 |       | 4.78 |
| slaf | qOC <sup>slaf</sup> -c7-6  | 1 | 14KEL | 119.11 | 2.60 | 0.61 |       | 4.46 |
| slaf | qOC <sup>slaf</sup> -c7-7  | 1 | 14KEL | 162.11 | 4.04 | 1.33 |       | 6.66 |
| slaf | qOC <sup>slaf</sup> -c8-1  | 1 | 15ALE | 35.01  | 2.69 |      | -0.69 | 5.04 |
| slaf | qOC <sup>slaf</sup> -c8-2  | 1 | 15ALE | 40.41  | 2.09 |      | -0.91 | 3.93 |
| slaf | qOC <sup>slaf</sup> -c8-3  | 1 | 15ALE | 66.91  | 2.30 | 0.89 |       | 4.21 |
| slaf | qOC <sup>slaf</sup> -c8-4  | 1 | 14KEL | 125.21 | 2.50 | 0.74 |       | 9.59 |
| slaf | qOC <sup>slaf</sup> -c9-1  | 1 | 14AY  | 22.41  | 2.18 |      | -0.36 | 4.00 |
| slaf | qOC <sup>slaf</sup> -c10-1 | 2 | 14AY  | 7.01   | 2.75 | 0.65 |       | 5.56 |
|      |                            |   | 16AY  | 7.01   | 2.79 | 0.75 |       | 5.58 |
| slaf | qOC <sup>slaf</sup> -c10-2 | 2 | 14AY  | 18.01  | 1.95 |      | -0.52 | 3.65 |
|      |                            |   | 15AY  | 18.01  | 2.14 |      | -0.62 | 3.99 |
| slaf | qOC <sup>slaf</sup> -c11-1 | 1 | 15AY  | 12.91  | 2.15 | 0.66 |       | 4.49 |
| slaf | qOC <sup>slaf</sup> -c12-1 | 1 | 15AY  | 10.01  | 2.07 | 0.44 |       | 4.38 |

|      |                            |   |       |        |      |       |       |
|------|----------------------------|---|-------|--------|------|-------|-------|
| slaf | qOC <sup>slaf</sup> -c12-2 | 1 | 16AY  | 18.91  | 2.08 | 0.51  | 3.73  |
| slaf | qOC <sup>slaf</sup> -c13-1 | 1 | 14AY  | 17.11  | 6.66 | 1.13  | 11.68 |
| slaf | qOC <sup>slaf</sup> -c13-2 | 1 | 15ALE | 20.01  | 4.01 | 0.85  | 7.51  |
| slaf | qOC <sup>slaf</sup> -c13-3 | 3 | 14KEL | 21.31  | 6.38 | 1.29  | 11.90 |
|      |                            |   | 15AY  | 21.31  | 4.17 | 0.98  | 7.74  |
|      |                            |   | BLUE  | 21.31  | 4.84 | 0.88  | 9.05  |
| slaf | qOC <sup>slaf</sup> -c13-4 | 4 | 14AY  | 27.21  | 5.79 | 1.10  | 10.24 |
|      |                            |   | 15ALE | 27.21  | 2.00 | 0.69  | 3.55  |
|      |                            |   | 15AY  | 27.21  | 3.47 | 1.19  | 6.05  |
|      |                            |   | BLUE  | 27.21  | 4.12 | 1.08  | 7.23  |
| slaf | qOC <sup>slaf</sup> -c15-1 | 2 | 14KEL | 4.51   | 8.51 | 3.13  | 51.95 |
|      |                            |   | 15ALE | 4.51   | 2.80 | 1.85  | 41.14 |
| slaf | qOC <sup>slaf</sup> -c15-2 | 4 | 14KEL | 63.91  | 3.19 | -2.82 | 14.18 |
|      |                            |   | 15ALE | 60.11  | 2.94 | -0.70 | 7.20  |
|      |                            |   | 15AY  | 62.11  | 2.69 | -0.54 | 5.34  |
|      |                            |   | 16AY  | 62.11  | 2.27 | -0.51 | 4.57  |
| slaf | qOC <sup>slaf</sup> -c14-1 | 1 | 16AY  | 49.01  | 2.13 | 1.57  | 4.16  |
| slaf | qOC <sup>slaf</sup> -c14-2 | 1 | 15AY  | 126.91 | 1.98 | -0.71 | 4.34  |
| slaf | qOC <sup>slaf</sup> -c17-1 | 1 | 15AY  | 49.21  | 3.80 | -1.99 | 17.45 |
| slaf | qOC <sup>slaf</sup> -c17-2 | 5 | 14KEL | 138.61 | 9.50 | 3.04  | 53.24 |
|      |                            |   | 15ALE | 138.61 | 4.12 | 2.02  | 47.86 |
|      |                            |   | 15AY  | 138.61 | 6.80 | 2.76  | 47.44 |

|      |                            |   |       |        |       |      |       |                           |
|------|----------------------------|---|-------|--------|-------|------|-------|---------------------------|
|      |                            |   | 16AY  | 138.61 | 3.08  | 3.09 | 46.80 |                           |
|      |                            |   | BLUE  | 138.61 | 10.75 | 2.77 | 52.07 |                           |
| slaf | qOC <sup>slaf</sup> -c17-3 | 6 | 14AY  | 148.21 | 10.08 | 2.42 | 46.57 | (Du et al., 2018; Zhao    |
|      |                            |   | 14KEL | 147.21 | 14.49 | 3.23 | 55.28 | et al., 2019; Zhu et al., |
|      |                            |   | 15ALE | 147.21 | 5.80  | 2.21 | 47.79 | 2020; Gong et al.,        |
|      |                            |   | 15AY  | 148.21 | 14.00 | 2.76 | 53.40 | 2022)                     |
|      |                            |   | 16AY  | 148.21 | 11.97 | 3.33 | 54.75 |                           |
|      |                            |   | BLUE  | 148.21 | 20.62 | 2.83 | 59.04 |                           |
| slaf | qOC <sup>slaf</sup> -c17-4 | 5 | 14AY  | 154.11 | 4.35  | 2.41 | 43.09 |                           |
|      |                            |   | 14KEL | 154.11 | 5.17  | 3.21 | 53.07 |                           |
|      |                            |   | 15AY  | 155.11 | 7.65  | 2.85 | 48.75 |                           |
|      |                            |   | 16AY  | 155.11 | 5.97  | 3.10 | 51.15 |                           |
|      |                            |   | BLUE  | 155.11 | 14.11 | 2.90 | 58.83 |                           |
| slaf | qOC <sup>slaf</sup> -c17-5 | 5 | 14AY  | 162.41 | 4.76  | 2.34 | 43.97 |                           |
|      |                            |   | 14KEL | 163.41 | 8.74  | 3.13 | 54.06 |                           |
|      |                            |   | 15AY  | 162.41 | 6.90  | 2.68 | 44.57 |                           |
|      |                            |   | 16AY  | 162.41 | 5.31  | 3.14 | 48.07 |                           |
|      |                            |   | BLUE  | 162.41 | 12.68 | 2.95 | 54.28 |                           |
| slaf | qOC <sup>slaf</sup> -c19-1 | 1 | 15AY  | 88.91  | 2.13  | 0.64 | 3.95  |                           |
| slaf | qOC <sup>slaf</sup> -c19-2 | 3 | 14AY  | 140.01 | 3.36  | 0.84 | 7.78  |                           |
|      |                            |   | 15AY  | 138.01 | 3.24  | 0.97 | 9.68  |                           |
|      |                            |   | 16AY  | 138.01 | 2.17  | 0.71 | 4.90  |                           |

|      |                            |   |       |        |       |      |       |
|------|----------------------------|---|-------|--------|-------|------|-------|
| slaf | qOC <sup>slaf</sup> -c25-1 | 1 | 16AY  | 52.21  | 2.23  | 2.26 | 18.74 |
| slaf | qOC <sup>slaf</sup> -c25-2 | 1 | 14KEL | 117.11 | 4.18  | 2.78 | 50.61 |
| slaf | qOC <sup>slaf</sup> -c25-3 | 6 | 15ALE | 121.81 | 3.24  | 1.72 | 11.39 |
|      |                            |   | 14AY  | 122.81 | 5.50  | 3.11 | 38.69 |
|      |                            |   | 15AY  | 122.81 | 7.86  | 2.93 | 35.17 |
|      |                            |   | 16AY  | 122.81 | 9.49  | 3.65 | 43.09 |
|      |                            |   | 14KEL | 122.81 | 10.02 | 3.21 | 43.01 |
|      |                            |   | BLUE  | 122.81 | 13.55 | 3.12 | 47.03 |
| slaf | qOC <sup>slaf</sup> -c24-1 | 1 | 14KEL | 60.21  | 2.06  | 1.02 | 4.41  |
| slaf | qOC <sup>slaf</sup> -c24-2 | 5 | 14KEL | 89.81  | 18.00 | 3.30 | 60.50 |
|      |                            |   | 15ALE | 89.81  | 2.90  | 2.34 | 41.42 |
|      |                            |   | 15AY  | 88.81  | 12.74 | 3.29 | 56.63 |
|      |                            |   | 16AY  | 89.81  | 12.93 | 3.53 | 51.25 |
|      |                            |   | BLUE  | 89.81  | 20.32 | 2.98 | 59.79 |
| slaf | qOC <sup>slaf</sup> -c24-3 | 6 | 14AY  | 96.21  | 7.72  | 2.86 | 47.64 |
|      |                            |   | 14KEL | 95.21  | 17.01 | 3.21 | 55.90 |
|      |                            |   | 15ALE | 98.21  | 3.71  | 1.77 | 46.52 |
|      |                            |   | 15AY  | 95.21  | 12.98 | 3.29 | 54.64 |
|      |                            |   | 16AY  | 95.21  | 13.58 | 3.38 | 53.35 |
|      |                            |   | BLUE  | 95.21  | 19.95 | 2.92 | 57.82 |
| slaf | qOC <sup>slaf</sup> -c23-1 | 4 | 14KEL | 30.01  | 2.97  | 0.52 | 5.34  |
|      |                            |   | 15ALE | 42.91  | 2.29  | 0.40 | 4.18  |

(Gong et al., 2022)

|      |                            |   |       |        |      |      |       |       |
|------|----------------------------|---|-------|--------|------|------|-------|-------|
|      |                            |   | 15AY  | 42.91  | 3.50 | 0.55 |       | 6.44  |
|      |                            |   | BLUE  | 41.21  | 3.36 | 0.44 |       | 6.13  |
| slaf | qOC <sup>slaf</sup> -c23-2 | 3 | 15AY  | 66.81  | 1.96 |      | -0.41 | 3.54  |
|      |                            |   | 16AY  | 66.81  | 2.10 |      | -0.43 | 3.67  |
|      |                            |   | BLUE  | 66.81  | 2.30 |      | -0.37 | 3.99  |
| slaf | qOC <sup>slaf</sup> -c20-1 | 1 | 16AY  | 19.91  | 3.05 |      | -0.71 | 5.42  |
| slaf | qOC <sup>slaf</sup> -c20-2 | 4 | 15ALE | 113.71 | 2.33 | 1.14 |       | 4.31  |
|      |                            |   | 15AY  | 112.71 | 3.21 | 2.04 |       | 15.87 |
|      |                            |   | 16AY  | 112.71 | 2.69 | 1.53 |       | 7.02  |
|      |                            |   | BLUE  | 112.71 | 2.60 | 1.36 |       | 8.52  |
| slaf | qOC <sup>slaf</sup> -c26-1 | 3 | 14AY  | 84.81  | 2.04 |      | -0.93 | 3.66  |
|      |                            |   | 15AY  | 85.81  | 2.96 |      | -1.58 | 7.70  |
|      |                            |   | 16AY  | 84.81  | 2.37 |      | -1.13 | 4.11  |
| slaf | qOC <sup>slaf</sup> -c26-2 | 4 | 14AY  | 96.71  | 3.45 | 1.19 |       | 6.76  |
|      |                            |   | 15AY  | 96.71  | 2.05 | 1.02 |       | 3.81  |
|      |                            |   | 14KEL | 96.71  | 2.86 | 1.26 |       | 5.17  |
|      |                            |   | BLUE  | 96.71  | 3.33 | 1.09 |       | 6.33  |
| slaf | qOC <sup>slaf</sup> -c18-1 | 1 | 15ALE | 19.91  | 1.86 | 0.52 |       | 3.54  |
| slaf | qOC <sup>slaf</sup> -c18-2 | 1 | 14KEL | 116.61 | 1.74 | 1.47 |       | 4.13  |

\* ♂ represents paternal XLZ24, and ♀ represents maternal LMY28.
