# Supplementary material for: Hub Genes in Stable QTLs Orchestrate the Accumulation of Cottonseed Oil in Upland Cotton via Catalyzing Key Steps of Lipid-Related Pathways
Source: MDPI journal article supplement (doi:10.3390/ijms242316595), 2023-11-22
Supplement: s1 [file s1]

**Table S6** Basic information of KOC QTLs of cottonseed identified via CHIP strategy

| Strategies | QTLs                      | Env<br>No | Env   | Position<br>(cM) | LOD  | Additive effect* |       | R2(%) | References          |
|------------|---------------------------|-----------|-------|------------------|------|------------------|-------|-------|---------------------|
|            |                           |           |       |                  |      | ♂(+)             | ♀(-)  |       |                     |
| chip       | qOC <sup>chip</sup> -c1-1 | 4         | 14AY  | 20.41            | 2.59 | 0.45             |       | 4.89  |                     |
|            |                           |           | 14KEL | 19.41            | 2.19 | 0.52             |       | 4.15  |                     |
|            |                           |           | 15ALE | 16.81            | 2.06 | 0.37             |       | 4.01  |                     |
|            |                           |           | BLUE  | 20.41            | 2.10 | 0.37             |       | 4.25  |                     |
| chip       | qOC <sup>chip</sup> -c1-2 | 1         | 14AY  | 31.61            | 3.39 | 0.63             |       | 7.01  |                     |
| chip       | qOC <sup>chip</sup> -c3-1 | 1         | 15AY  | 48.61            | 2.08 | 0.46             |       | 3.87  |                     |
| chip       | qOC <sup>chip</sup> -c3-2 | 2         | 14KEL | 57.81            | 2.65 | 0.59             |       | 5.03  |                     |
|            |                           |           | 16AY  | 55.41            | 2.01 | 0.47             |       | 3.66  |                     |
| chip       | qOC <sup>chip</sup> -c3-3 | 1         | 15AY  | 66.61            | 2.46 |                  | -0.49 | 4.35  |                     |
| chip       | qOC <sup>chip</sup> -c4-1 | 1         | 14AY  | 85.71            | 2.13 |                  | -0.37 | 4.02  |                     |
| chip       | qOC <sup>chip</sup> -c5-1 | 1         | BLUE  | 8.81             | 2.54 |                  | -0.43 | 5.80  |                     |
| chip       | qOC <sup>chip</sup> -c5-2 | 2         | 16AY  | 77.31            | 2.76 | 0.46             |       | 4.77  |                     |
|            |                           |           | BLUE  | 77.31            | 2.08 | 0.33             |       | 3.63  |                     |
| chip       | qOC <sup>chip</sup> -c5-3 | 3         | 15ALE | 149.31           | 2.27 | 0.36             |       | 3.88  | (Gong et al., 2022) |
|            |                           |           | 15AY  | 150.31           | 2.83 | 0.49             |       | 5.23  |                     |
|            |                           |           | BLUE  | 150.21           | 1.69 | 0.36             |       | 2.99  |                     |
| chip       | qOC <sup>chip</sup> -c6-1 | 3         | 14AY  | 51.21            | 5.47 | 0.63             |       | 10.22 | (Gong et al., 2022) |
|            |                           |           | 15AY  | 51.71            | 2.92 | 0.49             |       | 5.64  |                     |
|            |                           |           | BLUE  | 51.11            | 2.54 | 0.38             |       | 4.88  |                     |

|      |                            |   |       |        |      |      |       |      |
|------|----------------------------|---|-------|--------|------|------|-------|------|
| chip | qOC <sup>chip</sup> -c6-2  | 2 | 14KEL | 58.41  | 1.73 | 0.58 |       | 3.34 |
|      |                            |   | BLUE  | 56.41  | 2.33 | 0.41 |       | 5.52 |
| chip | qOC <sup>chip</sup> -c7-1  | 1 | BLUE  | 44.41  | 2.77 |      | -2.06 | 5.18 |
| chip | qOC <sup>chip</sup> -c7-2  | 1 | 15AY  | 69.61  | 2.32 |      | -1.71 | 4.59 |
| chip | qOC <sup>chip</sup> -c7-3  | 1 | 14AY  | 128.31 | 2.14 |      | -1.82 | 5.88 |
| chip | qOC <sup>chip</sup> -c8-1  | 1 | 15ALE | 11.41  | 4.02 | 0.70 |       | 7.02 |
| chip | qOC <sup>chip</sup> -c8-2  | 1 | 15ALE | 32.11  | 1.86 |      | -0.44 | 3.44 |
| chip | qOC <sup>chip</sup> -c9-1  | 1 | 14AY  | 34.81  | 2.60 |      | -0.40 | 4.70 |
| chip | qOC <sup>chip</sup> -c9-2  | 1 | 14KEL | 47.41  | 2.63 | 0.45 |       | 4.27 |
| chip | qOC <sup>chip</sup> -c10-1 | 2 | 14KEL | 8.21   | 2.03 | 0.54 |       | 5.76 |
|      |                            |   | 16AY  | 11.21  | 3.17 | 0.60 |       | 8.20 |
| chip | qOC <sup>chip</sup> -c10-2 | 2 | 14AY  | 34.41  | 2.17 | 0.48 |       | 4.19 |
|      |                            |   | BLUE  | 34.41  | 2.41 | 0.47 |       | 4.43 |
| chip | qOC <sup>chip</sup> -c10-3 | 1 | 14KEL | 38.11  | 2.38 | 0.46 |       | 4.00 |
| chip | qOC <sup>chip</sup> -c10-4 | 1 | 16AY  | 64.51  | 2.88 |      | -0.60 | 5.35 |
| chip | qOC <sup>chip</sup> -c10-5 | 1 | 16AY  | 67.11  | 2.22 |      | -0.54 | 4.13 |
| chip | qOC <sup>chip</sup> -c10-5 | 3 | 14KEL | 78.21  | 4.08 | 0.65 |       | 7.47 |
|      |                            |   | 15ALE | 78.41  | 4.26 | 0.54 |       | 7.51 |
|      |                            |   | 16AY  | 78.21  | 3.85 | 0.68 |       | 7.41 |
| chip | qOC <sup>chip</sup> -c11-1 | 1 | 14AY  | 35.41  | 2.30 | 0.56 |       | 4.39 |
| chip | qOC <sup>chip</sup> -c12-1 | 2 | 14KEL | 41.31  | 4.20 | 0.73 |       | 7.04 |
|      |                            |   | BLUE  | 41.31  | 2.56 | 0.43 |       | 4.15 |

|      |                            |   |       |        |      |      |       |      |
|------|----------------------------|---|-------|--------|------|------|-------|------|
| chip | qOC <sup>chip</sup> -c12-2 | 1 | 15ALE | 62.11  | 2.08 | 0.45 |       | 3.52 |
| chip | qOC <sup>chip</sup> -c12-3 | 5 | 14KEL | 122.21 | 2.19 |      | -0.46 | 3.89 |
|      |                            |   | 15ALE | 122.21 | 2.55 |      | -0.40 | 4.66 |
|      |                            |   | 15AY  | 122.21 | 2.04 |      | -0.40 | 3.61 |
|      |                            |   | 16AY  | 122.21 | 3.05 |      | -0.50 | 5.45 |
|      |                            |   | BLUE  | 122.21 | 2.96 |      | -0.41 | 5.44 |
| chip | qOC <sup>chip</sup> -c13-1 | 2 | 14KEL | 1.51   | 2.24 | 0.75 |       | 5.11 |
|      |                            |   | 15ALE | 1.51   | 2.38 | 0.64 |       | 5.53 |
| chip | qOC <sup>chip</sup> -c13-2 | 1 | 16AY  | 42.01  | 2.31 |      | -0.45 | 4.17 |
| chip | qOC <sup>chip</sup> -c13-3 | 1 | 14KEL | 78.61  | 2.35 | 0.45 |       | 4.38 |
| chip | qOC <sup>chip</sup> -c13-4 | 2 | 15AY  | 102.41 | 3.05 | 0.47 |       | 5.35 |
|      |                            |   | BLUE  | 102.41 | 2.54 | 0.35 |       | 4.41 |
| chip | qOC <sup>chip</sup> -c14-1 | 2 | 15AY  | 71.21  | 2.43 | 0.69 |       | 4.38 |
|      |                            |   | BLUE  | 70.71  | 2.19 | 0.55 |       | 3.93 |
| chip | qOC <sup>chip</sup> -c14-2 | 1 | 14AY  | 75.71  | 1.75 | 0.48 |       | 3.13 |
| chip | qOC <sup>chip</sup> -c14-3 | 1 | 16AY  | 106.61 | 2.12 |      | -0.48 | 3.99 |
| chip | qOC <sup>chip</sup> -c16-1 | 1 | 15ALE | 26.91  | 2.04 | 0.38 |       | 4.52 |
| chip | qOC <sup>chip</sup> -c17-1 | 1 | 15ALE | 4.61   | 1.71 | 0.33 |       | 3.29 |
| chip | qOC <sup>chip</sup> -c18-1 | 1 | 15ALE | 22.51  | 2.50 | 0.41 |       | 4.75 |
| chip | qOC <sup>chip</sup> -c19-1 | 2 | 16AY  | 25.61  | 3.03 |      | -0.49 | 5.57 |
|      |                            |   | BLUE  | 25.61  | 2.63 |      | -0.37 | 4.79 |
| chip | qOC <sup>chip</sup> -c19-2 | 1 | 14AY  | 68.01  | 1.92 | 0.43 |       | 3.25 |

|      |                            |   |       |       |      |      |       |       |                     |
|------|----------------------------|---|-------|-------|------|------|-------|-------|---------------------|
| chip | qOC <sup>chip</sup> -c19-3 | 1 | BLUE  | 92.61 | 2.16 |      | -0.39 | 4.51  |                     |
| chip | qOC <sup>chip</sup> -c20-1 | 3 | 15ALE | 32.11 | 3.69 | 0.54 |       | 6.66  |                     |
| chip | qOC <sup>chip</sup> -c21-1 | 3 | 14KEL | 19.91 | 2.69 | 0.55 |       | 5.11  |                     |
|      |                            |   | 15AY  | 16.31 | 2.49 | 0.71 |       | 7.96  |                     |
|      |                            |   | BLUE  | 16.31 | 3.30 | 0.69 |       | 11.10 |                     |
| chip | qOC <sup>chip</sup> -c21-2 | 3 | 14AY  | 32.11 | 2.71 |      | -0.61 | 6.86  |                     |
|      |                            |   | 14KEL | 35.11 | 3.60 |      | -0.88 | 10.49 |                     |
|      |                            |   | BLUE  | 33.11 | 2.15 |      | -0.54 | 6.43  |                     |
| chip | qOC <sup>chip</sup> -c23-1 | 6 | 14AY  | 24.71 | 3.22 | 0.43 |       | 5.58  | (Gong et al., 2022) |
|      |                            |   | 14KEL | 25.41 | 2.01 | 0.40 |       | 3.36  |                     |
|      |                            |   | 15ALE | 25.41 | 2.45 | 0.38 |       | 4.43  |                     |
|      |                            |   | 15AY  | 25.51 | 3.34 | 0.55 |       | 6.26  |                     |
|      |                            |   | 16AY  | 25.51 | 2.13 | 0.43 |       | 3.98  |                     |
|      |                            |   | BLUE  | 25.51 | 4.00 | 0.46 |       | 6.97  |                     |
| chip | qOC <sup>chip</sup> -c23-2 | 1 | 14AY  | 30.41 | 1.97 | 0.47 |       | 5.82  |                     |
| chip | qOC <sup>chip</sup> -c25-1 | 3 | 14KEL | 83.91 | 3.14 | 0.60 |       | 5.40  |                     |
|      |                            |   | 15ALE | 83.91 | 2.12 | 0.41 |       | 3.90  |                     |
|      |                            |   | BLUE  | 83.91 | 2.07 | 0.39 |       | 3.80  |                     |
| chip | qOC <sup>chip</sup> -c26-1 | 2 | 14KEL | 37.61 | 2.66 | 0.53 |       | 5.08  |                     |
|      |                            |   | 16AY  | 36.61 | 2.83 | 0.46 |       | 4.81  |                     |

---

\* ♂ represents paternal XLZ24, and ♀ represents maternal LMY28.
