# Supplementary material for: Hub Genes in Stable QTLs Orchestrate the Accumulation of Cottonseed Oil in Upland Cotton via Catalyzing Key Steps of Lipid-Related Pathways
Source: Int J Mol Sci. 2023 Nov 22;24(23):16595. doi: 10.3390/ijms242316595 (PMC10706765; doi:10.3390/ijms242316595)
Supplement: Supplementary file 1 [file ijms-24-16595-s001.zip › Table S7.xlsx]

## Sheet: Sheet1
Table S7 A total number of 162 genes in stable QTLs were identified to be associated with lipid metabolism in Arabidopsis
Strategies	Gene ID	Gene Name	ArabDesc	AT Locus ID	Pathway
CHIP_gene	GH_A01G0486	apgM	Cofactor-independent phosphoglycerate mutase	AT3G30841	Glycolysis	Cytosol	2,3-bisphosphoglycerate-independent phosphoglycerate mutase
CHIP_gene	GH_A01G0515	PPC16	phosphoenolpyruvate carboxylase 3	AT3G14940	Glycolysis	Cytosol	phosphoenolpyruvate carboxylase
CHIP_gene	GH_A01G0526	ABCG10	ABC-2 type transporter family protein	AT1G53270	Cuticular Wax Synthesis		ABC Transporter
CHIP_gene	GH_A05G3915	BCCP2	biotin carboxyl carrier protein 2	AT5G15530	Plastid Fatty Acid Synthesis	Plastid	Biotin Carboxyl Carrier Protein of Heteromeric ACCase	1	8.30435	Clustered
CHIP_gene	GH_A05G4021	PAD4	alpha/beta-Hydrolases superfamily protein	AT3G52430	Lipase
CHIP_gene	GH_A05G4030	FAAH	fatty acid amide hydrolase	AT5G64440	Lipid Signaling		Fatty Acid Amide Hydrolase
CHIP_gene	GH_A05G4037	ABCG5	ABC-2 type transporter family protein	AT2G13610	Cuticular Wax Synthesis		ABC Transporter
CHIP_gene	GH_A05G4111	TGD3	non-intrinsic ABC protein 11	AT1G65410	Lipid Trafficking		ATPase
CHIP_gene	GH_A05G4171	CYP96A15	cytochrome P450%2C family 96%2C subfamily A%2C polypeptide 10	AT4G39490	Cuticular Wax Synthesis		Midchain Alkane Hydroxylase / Cytochrome P450, 96A
CHIP_gene	GH_A05G4173	CYP96A15	cytochrome P450%2C family 96%2C subfamily A%2C polypeptide 10	AT4G39490	Cuticular Wax Synthesis		Midchain Alkane Hydroxylase / Cytochrome P450, 96A
CHIP_gene	GH_A05G4205	PIP5K4	phosphatidyl inositol monophosphate 5 kinase 4	AT3G56960	Lipid Signaling		Phosphatidylinositol-Phosphate Kinase type IB
CHIP_gene	GH_A05G4230	GLY1	NAD-dependent glycerol-3-phosphate dehydrogenase family protein	AT2G40690	Eukaryotic Phospholipid Synthesis		NAD-dependent Glycerol-3-Phosphate Dehydrogenase (plastidial?)	3	3.1875	Clustered
CHIP_gene	GH_A05G4256	ACS	acetyl-CoA synthetase	AT5G36880	Other Acyl Lipid Related	Plastid	Acetyl-coA synthetase	1	8.30435	Clustered
CHIP_gene	GH_A05G4275	ALA4	ATPase E1-E2 type family protein / haloacid dehalogenase-like hydrolase family protein	AT1G17500	Miscellaneous: lipid related		Translocase
SLAF_gene	GH_A07G2133	LIP2	Myzus persicae-induced lipase 1	AT5G14180	TAG Degradation		Triacylglycerol Lipase (TAGL)
SLAF_gene	GH_A07G2134	At2g04570	GDSL-like Lipase/Acylhydrolase superfamily protein	AT2G04570	Lipase
SLAF_gene	GH_A07G2135	At2g42990	GDSL-like Lipase/Acylhydrolase superfamily protein	AT2G42990	Lipase
SLAF_gene	GH_A13G1192	ACP1	acyl carrier protein 3	AT1G54630	Plastid Fatty Acid Synthesis	Plastid	Acyl Carrier Protein
SLAF_gene	GH_A13G1200	NA	Pyruvate kinase family protein	AT5G56350	Glycolysis	Cytosol	pyruvate kinase
SLAF_gene	GH_A13G1217	At5g33370	GDSL-like Lipase/Acylhydrolase superfamily protein	AT5G33370	Lipase
SLAF_gene	GH_D01G1411	LPAT2	lysophosphatidyl acyltransferase 2	AT3G57650	Eukaryotic Glycerolipid/TAG Synthesis	Endomembrane (GFP)	1-Acylglycerol-3-Phosphate Acyltransferase	1	8.30435	Clustered
SLAF_gene	GH_D01G1425	ABCG22	ABC-2 type transporter family protein	AT5G06530	Cuticular Wax Synthesis		ABC Transporter
SLAF_gene	GH_D01G1463	FAD2	fatty acid desaturase 2	AT3G12120	Eukaryotic Glycerolipid/TAG Synthesis	Endomembrane	Oleate Desaturase	1	8.30435	Clustered
SLAF_gene	GH_D01G1464	FAD2	fatty acid desaturase 2	AT3G12120	Eukaryotic Glycerolipid/TAG Synthesis	Endomembrane	Oleate Desaturase	1	8.30435	Clustered
SLAF_gene	GH_D01G1564	OPR11	12-oxophytodienoate reductase 1	AT1G76680	Lipid Signaling		Oxo-Phytodienoic Acid Reductase
SLAF_gene	GH_D03G0023	SAC7	Phosphoinositide phosphatase family protein	AT3G51460	Lipid Signaling		Sac domain-containing Phosphoinositide Phosphatase
SLAF_gene	GH_D03G0041	At5g33370	GDSL-like Lipase/Acylhydrolase superfamily protein	AT5G33370	Lipase
SLAF_gene	GH_D03G0050	PLDDELTA	phospholipase D delta	AT4G35790	Lipid Signaling		Phospholipase D &delta;	2	2.66667	Clustered
SLAF_gene	GH_D03G0073	EXL3	GDSL-like Lipase/Acylhydrolase superfamily protein	AT1G75900	Lipase
SLAF_gene	GH_D03G0074	EXL3	GDSL-like Lipase/Acylhydrolase superfamily protein	AT1G75900	Lipase
SLAF_gene	GH_D03G0208	PLP3	PATATIN-like protein 4	AT4G37050	Lipase		Acyl-Hydrolase (Patatin-like)
SLAF_gene	GH_D03G0209	PLP2	phospholipase A 2A	AT2G26560	Lipid Signaling		Acyl-Hydrolase (Patatin-like)
SLAF_gene	GH_D03G0242	At5g67130	PLC-like phosphodiesterases superfamily protein	AT5G67130	Phospholipase
SLAF_gene	GH_D03G0370	PLAT2	Lipase/lipooxygenase%2C PLAT/LH2 family protein	AT2G22170	Lipase
SLAF_gene	GH_D03G0374	ABCC1	peroxisomal ABC transporter 1	AT4G39850	beta-Oxidation		ABC Acyl Transporter (peroxisomal)
SLAF_gene	GH_D03G0426	PFK5	phosphofructokinase 5	AT2G22480	Glycolysis	Plastid	6-phosphofructokinase	2	2.66667	Clustered
SLAF_gene	GH_D03G0435	gpmA	Phosphoglycerate mutase family protein	AT1G22170	Glycolysis	Plastid	phosphoglycerate/bisphosphoglycerate mutase
SLAF_gene	GH_D03G0440	fabZ	Thioesterase superfamily protein	AT5G10160	Plastid Fatty Acid Synthesis	Plastid	Hydroxyacyl-ACP Dehydratase
SLAF_gene	GH_D03G0525	NA	4-coumarate:CoA ligase 3	AT1G65060	Aromatic Suberin Synthesis		4-Coumarate-CoA Ligase
SLAF_gene	GH_D03G0529	RRP45B	3'-5'-exoribonuclease family protein	AT3G60500	Cuticular Wax Synthesis		CER7 Protein involved in wax synthesis
SLAF_gene	GH_D03G0594	PLDALPHA4	phospholipase D alpha 4	AT1G55180	Lipid Signaling		Phospholipase D &&alpha;;
SLAF_gene	GH_D03G0603	PFK3	phosphofructokinase 3	AT4G26270	Glycolysis	Cytosol	6-phosphofructokinase	2	2.66667	Clustered
SLAF_gene	GH_D03G0612	At3g26430	GDSL-like Lipase/Acylhydrolase superfamily protein	AT3G26430	Lipase
SLAF_gene	GH_D03G0644	S-ACP-DES6	Plant stearoyl-acyl-carrier-protein desaturase family protein	AT1G43800	Plastidial Fatty Acid Synthesis		Stearoyl-ACP Desaturase
SLAF_gene	GH_D03G0675	PIP5K4	phosphatidyl inositol monophosphate 5 kinase 4	AT3G56960	Lipid Signaling		Phosphatidylinositol-Phosphate Kinase type IB
SLAF_gene	GH_D03G0778	NA	nucleotide transporter 1	AT1G80300	Plastid Transporters	Plastid	nucleotide transporter 1
SLAF_gene	GH_D03G0780	CSE	lysophospholipase 2	AT1G52760	TAG Degradation		Monoacylglycerol Lipase (MAGL)
SLAF_gene	GH_D03G0851	ABCG22	ABC-2 type transporter family protein	AT5G06530	Cuticular Wax Synthesis		ABC Transporter
SLAF_gene	GH_D03G0938	LACS4	AMP-dependent synthetase and ligase family protein	AT4G23850	Eukaryotic Glycerolipid/TAG Synthesis		Long-Chain Acyl-CoA Synthetase	3	3.1875	Seed
SLAF_gene	GH_D03G0956	PI4KG2	phosphatidylinositol 4-kinase gamma-like protein	AT1G64460	Lipid Signaling		Phosphatidylinositol-4-Kinase &gamma;
SLAF_gene	GH_D03G0974	EMB8	esterase/lipase/thioesterase family protein	AT3G50790	Lipase
SLAF_gene	GH_D03G1142	ENO1	enolase 1	AT1G74030	Glycolysis	Plastid	phosphoenolpyruvate enolase	2	2.66667	Clustered
SLAF_gene	GH_D03G1150	ALA9	ATPase E1-E2 type family protein / haloacid dehalogenase-like hydrolase family protein	AT1G68710	Miscellaneous: lipid related		Translocase
SLAF_gene	GH_D03G1178	At1g06990	GDSL-like Lipase/Acylhydrolase superfamily protein	AT1G06990	Lipase
SLAF_gene	GH_D03G1223	pgk2	P-loop containing nucleoside triphosphate hydrolases superfamily protein	AT5G61450	Glycolysis	Plastid	phosphoglycerate kinase
SLAF_gene	GH_D03G1240	NA	UDP-glucose pyrophosphorylase 2	AT5G17310	Glycolysis	Cytosol	UDP-glucose pyrophosphorylase
SLAF_gene	GH_D03G1283	HSD1	hydroxysteroid dehydrogenase 1	AT5G50700	Oil Storage	Oilbody	Steroleosin	2	2.66667	Clustered
SLAF_gene	GH_D03G1326	NPC1	non-specific phospholipase C1	AT1G07230	Plastidial Glycerolipid, Galactolipid and Sulfolipid Synthesis		Phospholipase C (Non specific)	3	3.1875	Clustered
SLAF_gene	GH_D03G1337	CYP86A1	cytochrome P450%2C family 86%2C subfamily A%2C polypeptide 1	AT5G58860	Aliphatic Suberin Synthesis		Fatty Acyl Omega-Hydroxylase (CYP86A) (ER)
SLAF_gene	GH_D03G1424	KCR1	beta-ketoacyl reductase 1	AT1G67730	Fatty Acid Elongation	Endomembrane	Ketoacyl-CoA Reductase	1	8.30435	Clustered
SLAF_gene	GH_D03G1428	CTIMC	triosephosphate isomerase	AT3G55440	Glycolysis	Cytosol	triosephosphate isomerase
SLAF_gene	GH_D03G1431	KCR1	beta-ketoacyl reductase 1	AT1G67730	Fatty Acid Elongation	Endomembrane	Ketoacyl-CoA Reductase	1	8.30435	Clustered
SLAF_gene	GH_D03G1444	RXW8	GDSL-like lipase/acylhydrolase superfamily protein	AT1G58520	Lipase
SLAF_gene	GH_D03G1462	PAH2	phosphatidic acid phosphohydrolase 2	AT5G42870	Eukaryotic Glycerolipid/TAG Synthesis	Endomembrane	Phosphatidate Phosphatase	3	3.1875	Clustered
SLAF_gene	GH_D03G1482	HACD2	Protein-tyrosine phosphatase-like%2C PTPLA	AT5G59770	Fatty Acid Elongation and Cuticular Wax Synthesis		Hydroxyacyl-CoA Dehydratase
SLAF_gene	GH_D03G1514	At3g45770	Polyketide synthase%2C enoylreductase family protein	AT3G45770	Mitochondrial Fatty Acid and Lipoic Acid Synthesis		Enoyl-ACP Reductase	2	2.66667	Clustered
SLAF_gene	GH_D05G0139	MGD2	monogalactosyldiacylglycerol synthase 2	AT5G20410	Plastidial Glycerolipid, Galactolipid and Sulfolipid Synthesis		Monogalactosyldiacylglycerol Synthase	3	3.1875	Clustered
SLAF_gene	GH_D05G0165	WIN1	Integrase-type DNA-binding superfamily protein	AT1G15360	Cuticular Wax Synthesis		SHN Transcription Factors
SLAF_gene	GH_D05G0192	LYPLA2	alpha/beta-Hydrolases superfamily protein	AT5G20060	Lipid Signaling		Lysophospholipase
SLAF_gene	GH_D05G0200	KCS11	3-ketoacyl-CoA synthase 11	AT2G26640	Fatty Acid Elongation	Endomembrane	Ketoacyl-CoA Synthase
SLAF_gene	GH_D05G0210	FAAH	fatty acid amide hydrolase	AT5G64440	Lipid Signaling		Fatty Acid Amide Hydrolase
SLAF_gene	GH_D05G0265	UGCG	Nucleotide-diphospho-sugar transferases superfamily protein	AT2G19880	Sphingolipid Synthesis		Glucosylceramide Synthase (UDP-glucose-dependent)
SLAF_gene	GH_D05G0280	PFK3	phosphofructokinase 3	AT4G26270	Glycolysis	Cytosol	6-phosphofructokinase	2	2.66667	Clustered
SLAF_gene	GH_D05G0291	PLA2-I	phospholipase A2-beta	AT2G19690	Lipid Signaling		Phospholipase A2
SLAF_gene	GH_D05G0315	NMT1	myristoyl-CoA:protein N-myristoyltransferase	AT5G57020	Miscellaneous: lipid related		Protein N-Myristoyltransferase
SLAF_gene	GH_D05G0342	OPR3	oxophytodienoate-reductase 3	AT2G06050	Lipid Signaling		Oxo-Phytodienoic Acid Reductase
SLAF_gene	GH_D05G0366	EMB8	alpha/beta-Hydrolases superfamily protein	AT2G03140	Lipase
SLAF_gene	GH_D05G0367	SS	sucrose synthase 4	AT3G43190	Sucrose Metabolism	Cytosol	Sucrose Synthase
SLAF_gene	GH_D05G0375	FAB1B	phosphatidylinositol-4-phosphate 5-kinase family protein	AT3G14270	Lipid Signaling		Phosphatidylinositol-Phosphate Kinase type III
SLAF_gene	GH_D05G0396	fabG	NAD(P)-binding Rossmann-fold superfamily protein	AT1G62610	Plastid Fatty Acid Synthesis	Plastid	Ketoacyl-ACP Reductase
SLAF_gene	GH_D05G0425	SQD1	sulfoquinovosyldiacylglycerol 1	AT4G33030	Plastidial Glycerolipid, Galactolipid and Sulfolipid Synthesis		UDP-Sulfoquinovose Synthase	3	3.1875	Clustered
SLAF_gene	GH_D05G0426	NA	Fatty acid/sphingolipid desaturase	AT2G46210	Sphingolipid Synthesis		Sphingobase-D8 Desaturase
SLAF_gene	GH_D05G0460	OLE16	Oleosin family protein	AT2G25890	Oil Storage	Oilbody	Oil-Body Oleosin
SLAF_gene	GH_D05G0472	CSE	alpha/beta-Hydrolases superfamily protein	AT5G11650	TAG Degradation		Monoacylglycerol Lipase (MAGL)
SLAF_gene	GH_D05G0482	GLIP1	GDSL lipase 1	AT5G40990	Lipase
SLAF_gene	GH_D05G0522	ABHD17B	alpha/beta-Hydrolases superfamily protein	AT4G31020	Phospholipase
SLAF_gene	GH_D05G0533	GAPN	aldehyde dehydrogenase 11A3	AT2G24270	Glycolysis	Cytosol	non-phosphorylating NADP-dependent glyceraldehyde-3-phosphate dehydrogenase
SLAF_gene	GH_D05G0548	LPAT1	Phospholipid/glycerol acyltransferase family protein	AT4G30580	Other Acyl Lipid Related	Plastid	1-Acylglycerol-3-Phosphate Acyltransferase
SLAF_gene	GH_D05G0559	PLD1	phospholipase D alpha 1	AT3G15730	Lipid Signaling		Phospholipase D &&alpha;;
SLAF_gene	GH_D06G0026	HXK2	hexokinase 3	AT1G47840	Glycolysis	Plastid	Hexokinase
CHIP_gene	GH_D06G2273	At4g16230	GDSL-like Lipase/Acylhydrolase superfamily protein	AT3G50400	Lipase
CHIP_gene	GH_D06G2275	LCAT4	alpha/beta-Hydrolases superfamily protein	AT4G19860	Eukaryotic Glycerolipid/TAG Synthesis		Phospholipid : Acyl acceptor Acyltransferase
CHIP_gene	GH_D06G2281	E1-BETA-2	Transketolase family protein	AT2G34590	Plastid Fatty Acid Synthesis	Plastid	E1-beta component of Pyruvate Dehydrogenase Complex
CHIP_gene	GH_D06G2300	At1g29670	GDSL-like Lipase/Acylhydrolase superfamily protein	AT1G29670	Lipase
CHIP_gene	GH_D06G2344	LOX3	lipoxygenase 3	AT1G17420	Lipid Signaling		Lipoxygenase
CHIP_gene	GH_D06G2345	LOX3	lipoxygenase 3	AT1G17420	Lipid Signaling		Lipoxygenase
CHIP_gene	GH_D06G2388	ACER	Alkaline phytoceramidase (aPHC)	AT4G22330	Sphingolipid Synthesis		Ceramidase
CHIP_gene	GH_D06G2389	CDS2	cytidinediphosphate diacylglycerol synthase 2	AT4G22340	Eukaryotic Glycerolipid/TAG Synthesis		CDP-DAG Synthase	3	3.1875	Clustered
SLAF_gene	GH_D08G1087	YLS3	Bifunctional inhibitor/lipid-transfer protein/seed storage 2S albumin superfamily protein	AT1G73890	Cuticular Wax Synthesis		Lipid Transfer Protein type 5
SLAF_gene	GH_D08G1108	WSD1	O-acyltransferase (WSD1-like) family protein	AT5G53390	Cuticular Wax Synthesis		Bifunctional Wax Ester Synthase / Diacylglycerol Acyltransferase
SLAF_gene	GH_D08G1112	LCKB2	Diacylglycerol kinase family protein	AT2G46090	Lipid Signaling		Diacylglycerol Kinase
SLAF_gene	GH_D08G1121	PKP4	pyruvate kinase family protein	AT3G49160	Glycolysis	Plastid	pyruvate kinase
SLAF_gene	GH_D08G1134	PKP2	plastidic pyruvate kinase beta subunit 1	AT5G52920	Glycolysis	Plastid	pyruvate kinase beta subunit
SLAF_gene	GH_D08G1149	DCR	HXXXD-type acyl-transferase family protein	AT5G23940	Cutin Synthesis		BAHD acyltransferase family
SLAF_gene	GH_D08G1169	LCKB2	Diacylglycerol kinase family protein	AT2G46090	Lipid Signaling		Diacylglycerol Kinase
SLAF_gene	GH_D08G1226	NA	phospholipid/glycerol acyltransferase family protein	AT1G32200	Plastidial Glycerolipid, Galactolipid and Sulfolipid Synthesis		Glycerol-3-Phosphate Acyltransferase (plastidial)
SLAF_gene	GH_D08G1299	KAS1	3-ketoacyl-acyl carrier protein synthase I	AT5G46290	Plastid Fatty Acid Synthesis	Plastid	Ketoacyl-ACP Synthase I
SLAF_gene	GH_D08G1305	PI4KG2	phosphoinositide 4-kinase gamma 4	AT2G46500	Lipid Signaling		Phosphatidylinositol-4-Kinase &gamma;
SLAF_gene	GH_D08G1306	At4g10955	alpha/beta-Hydrolases superfamily protein	AT4G10955	Lipase
SLAF_gene	GH_D08G1355	At4g39670	Glycolipid transfer protein (GLTP) family protein	AT4G39670	Sphingolipid Synthesis		Sphingosine Transfer Protein
SLAF_gene	GH_D08G1432	CSE	alpha/beta-Hydrolases superfamily protein	AT3G62860	TAG Degradation		Monoacylglycerol Lipase (MAGL)
SLAF_gene	GH_D08G1434	SUS2	sucrose synthase 3	AT4G02280	Sucrose Metabolism	Cytosol	Sucrose Synthase
SLAF_gene	GH_D08G1444	NA	alpha/beta-Hydrolases superfamily protein	AT1G02660	Miscellaneous: lipid related		Lipid Acylhydrolase-like
SLAF_gene	GH_D08G1458	GPAT3	glycerol-3-phosphate acyltransferase 3	AT4G01950	Other Acyl Lipid Related		1-acylglycerol-3-phosphate O-acyltransferase
SLAF_gene	GH_D08G1468	At3g62280	GDSL-like Lipase/Acylhydrolase superfamily protein	AT3G62280	Lipase
SLAF_gene	GH_D08G1505	KCS1	3-ketoacyl-CoA synthase 1	AT1G01120	Fatty Acid Elongation and Cuticular Wax Synthesis		Ketoacyl-CoA Synthase
SLAF_gene	GH_D08G1541	PIP5K10	Phosphatidylinositol-4-phosphate 5-kinase%2C core	AT1G01460	Lipid Signaling		Phosphatidylinositol-Phosphate Kinase type IA
SLAF_gene	GH_D08G1593	DAGLA	alpha/beta-Hydrolases superfamily protein	AT3G49050	Miscellaneous: lipid related		Lipid Acylhydrolase-like
SLAF_gene	GH_D08G1598	CYP86A8	cytochrome P450%2C family 86%2C subfamily A%2C polypeptide 8	AT2G45970	Cutin Synthesis		Fatty Acyl omega-Hydroxylase (CYP86A)
SLAF_gene	GH_D08G1604	LCKB2	Diacylglycerol kinase family protein	AT2G46090	Lipid Signaling		Diacylglycerol Kinase
SLAF_gene	GH_D08G1663	ppt-1	alpha/beta-Hydrolases superfamily protein	AT3G60340	Miscellaneous: lipid related		Thioesterase (PPT1-like)
SLAF_gene	GH_D09G1595	NA	phosphoglycerate kinase 1	AT3G12780	Glycolysis	Plastid	phosphoglycerate kinase
SLAF_gene	GH_D09G1707	PAH1	Lipin family protein	AT3G09560	Eukaryotic Glycerolipid/TAG Synthesis	Endomembrane	Phosphatidate Phosphatase	2	2.66667	Clustered
SLAF_gene	GH_D09G1720	NA	Bifunctional inhibitor/lipid-transfer protein/seed storage 2S albumin superfamily protein	AT3G53980	Cuticular Wax Synthesis		Lipid Transfer Protein type 4
SLAF_gene	GH_D09G1731	IPCS1	Inositol phosphorylceramide synthase 1	AT3G54020	Sphingolipid Synthesis		Inositolphosphorylceramide Synthase
SLAF_gene	GH_D09G1751	GPAT6	glycerol-3-phosphate acyltransferase 6	AT2G38110	Cutin Synthesis		Glycerol-3-Phosphate Acyltransferase (endomembrane predicted?)	2	2.66667	Clustered
SLAF_gene	GH_D09G1772	ACX4	acyl-CoA oxidase 4	AT3G51840	beta-Oxidation		Acyl-CoA Oxidase	1	8.30435	Clustered
SLAF_gene	GH_D09G1807	IP5P12	Endonuclease/exonuclease/phosphatase family protein	AT2G43900	Lipid Signaling		Phosphoinositide 5-Phosphatase Type II
SLAF_gene	GH_D09G1824	At5g03610	GDSL-like Lipase/Acylhydrolase superfamily protein	AT5G03610	Lipase
SLAF_gene	GH_D09G1845	MSMEG_0220	alpha/beta-Hydrolases superfamily protein	AT1G73480	TAG Degradation		Monoacylglycerol Lipase (MAGL)
SLAF_gene	GH_D09G1860	DOX2	alpha dioxygenase	AT1G73680	Lipid Signaling		alpha;;-Dioxygenase-Peroxidase (involved in fatty acid &&alpha;;-oxidation)
SLAF_gene	GH_D09G1890	DIT1	dicarboxylate transporter 1	AT5G12860	Plastid Transporters	Plastid	dicarboxylate transporter
SLAF_gene	GH_D09G1897	At5g51830	pfkB-like carbohydrate kinase family protein	AT5G51830	Glycolysis	Cytosol	pfkB-type carbohydrate kinase family protein	4	1	Clustered
SLAF_gene	GH_D09G1917	NA	Bifunctional inhibitor/lipid-transfer protein/seed storage 2S albumin superfamily protein	AT3G18280	Cuticular Wax Synthesis		Lipid Transfer Protein type 2
SLAF_gene	GH_D09G1920	NA	Bifunctional inhibitor/lipid-transfer protein/seed storage 2S albumin superfamily protein	AT3G18280	Cuticular Wax Synthesis		Lipid Transfer Protein type 2
SLAF_gene	GH_D09G1921	NA	Bifunctional inhibitor/lipid-transfer protein/seed storage 2S albumin superfamily protein	AT3G18280	Cuticular Wax Synthesis		Lipid Transfer Protein type 2
SLAF_gene	GH_D09G1922	NA	Bifunctional inhibitor/lipid-transfer protein/seed storage 2S albumin superfamily protein	AT3G18280	Cuticular Wax Synthesis		Lipid Transfer Protein type 2
SLAF_gene	GH_D09G1981	BDG3	alpha/beta-Hydrolases superfamily protein	AT1G64670	Lipid Signaling		Hydrolase-like Protein; Hydrolase-like Protein (cell wall located); Lysophospholipase
CHIP_gene	GH_D09G2052	KAS3B	3-ketoacyl-acyl carrier protein synthase III	AT1G62640	Plastid Fatty Acid Synthesis	Plastid	Ketoacyl-ACP Synthase III
CHIP&SLAF_gene	GH_D09G2062	ACX1	acyl-CoA oxidase 1	AT4G16760	beta-Oxidation		Acyl-CoA Oxidase	1	8.30435	Seed
CHIP&SLAF_gene	GH_D09G2102	PAP3	Plastid-lipid associated protein PAP / fibrillin family protein	AT2G35490	Miscellaneous: lipid related		Plastid Lipid-associated Protein
SLAF_gene	GH_D09G2156	ACER	Alkaline phytoceramidase (aPHC)	AT4G22330	Sphingolipid Synthesis		Ceramidase
SLAF_gene	GH_D09G2186	TGD1	trigalactosyldiacylglycerol 1	AT1G19800	Plastidial Glycerolipid, Galactolipid and Sulfolipid Synthesis		Permease-like Protein of Inner Chloroplast Envelope
SLAF_gene	GH_D09G2201	DGL	alpha/beta-Hydrolases superfamily protein	AT1G05800	Lipid Signaling		Acylhydrolase (DAD1-like)
CHIP_gene	GH_D11G3204	KAS2	fatty acid biosynthesis 1	AT1G74960	Plastid Fatty Acid Synthesis	Plastid	Ketoacyl-ACP Synthase II
CHIP_gene	GH_D11G3208	KAS2	fatty acid biosynthesis 1	AT1G74960	Plastid Fatty Acid Synthesis	Plastid	Ketoacyl-ACP Synthase II
CHIP_gene	GH_D11G3341	GAPCP2	glyceraldehyde-3-phosphate dehydrogenase of plastid 2	AT1G16300	Glycolysis	Plastid	glyceraldehyde-3-phosphate dehydrogenase C-2 Plastid isoform
CHIP_gene	GH_D11G3380	ACBP4	acyl-CoA binding protein 4	AT3G05420	Eukaryotic Glycerolipid/TAG Synthesis	Cytosol	Acyl CoA Binding Protein	4	1	Clustered
CHIP_gene	GH_D11G3384	LACS7	long-chain acyl-CoA synthetase 7	AT5G27600	beta-Oxidation		Long-Chain Acyl-CoA Synthetase (peroxisomal)	2	2.66667	Clustered
SLAF_gene	GH_D12G1617	PSS1	phosphatidyl serine synthase family protein	AT1G15110	Eukaryotic Glycerolipid/TAG Synthesis		Base-Exchange-type Phosphatidylserine Synthase
SLAF_gene	GH_D12G1618	FATB1	fatty acyl-ACP thioesterases B	AT1G08510	Plastid Fatty Acid Synthesis	Plastid	Acyl-ACP Thioesterase B
SLAF_gene	GH_D12G1641	ACLA-1	ATP-citrate lyase A-1	AT1G10670	Other Acyl Lipid Related	Cytosol?	ATP Citrate Lyase A subunit	1	8.30435	Clustered
SLAF_gene	GH_D12G1675	CLKR27	NAD(P)-binding Rossmann-fold superfamily protein	AT1G24360	Plastid Fatty Acid Synthesis	Plastid	Ketoacyl-ACP Reductase
SLAF_gene	GH_D12G1703	PXG4	Caleosin-related family protein	AT1G70670	Oil Storage	Oilbody	Caleosin
SLAF_gene	GH_D12G1720	VAS	Bifunctional inhibitor/lipid-transfer protein/seed storage 2S albumin superfamily protein	AT2G37870	Cuticular Wax Synthesis		Lipid Transfer Protein type 5
SLAF_gene	GH_D12G1775	PI4KG7	phosphoinositide 4-kinase gamma 7	AT2G03890	Lipid Signaling		Phosphatidylinositol-4-Kinase &gamma;
SLAF_gene	GH_D12G1844	SBH2	sphingoid base hydroxylase 2	AT1G14290	Sphingolipid Synthesis		Sphingobase C4-Hydroxylase
SLAF_gene	GH_D12G1858	WRI1	Integrase-type DNA-binding superfamily protein	AT3G54320	Transcription factors	Nucleus	WRINKLED 1; DNA binding / transcription factor	3	3.1875	Clustered
SLAF_gene	GH_D12G1870	At4g39670	Glycolipid transfer protein (GLTP) family protein	AT4G39670	Sphingolipid Synthesis		Sphingosine Transfer Protein
SLAF_gene	GH_D12G1877	CXE6	alpha/beta-Hydrolases superfamily protein	AT1G68620	Lipase
SLAF_gene	GH_D12G1887	AOC	allene oxide cyclase 4	AT1G13280	Lipid Signaling		Allene Oxide Synthase
SLAF_gene	GH_D12G1910	PPC4	phosphoenolpyruvate carboxylase 4	AT1G68750	Glycolysis	Cytosol	phosphoenolpyruvate carboxylase	1	8.30435	Clustered
